# Supplementary material for: Inducing macroporosity in hydrogels using hydrogen peroxide as a blowing agent
Source: Royal Society of Chemistry journal article supplement (doi:10.1039/c6qm00052e), 2016-08-18
Supplement: c6qm00052e1.pdf [file c6qm00052e1.pdf]

## Inducing Macroporosity in Hydrogels using Hydrogen Peroxide as a Blowing Agent

Nicky Mac Kenna, Aoife Morrin

School of Chemical Sciences, National Centre for Sensor Research, Dublin City University,  
Dublin 9.

### Supplementary Information

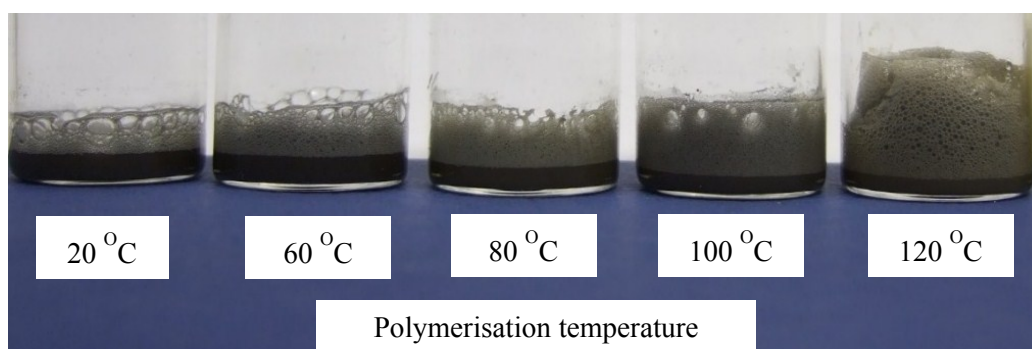

**ESI 1.** Photographs of macroporous hydrogels formed at various polymerisation temperatures

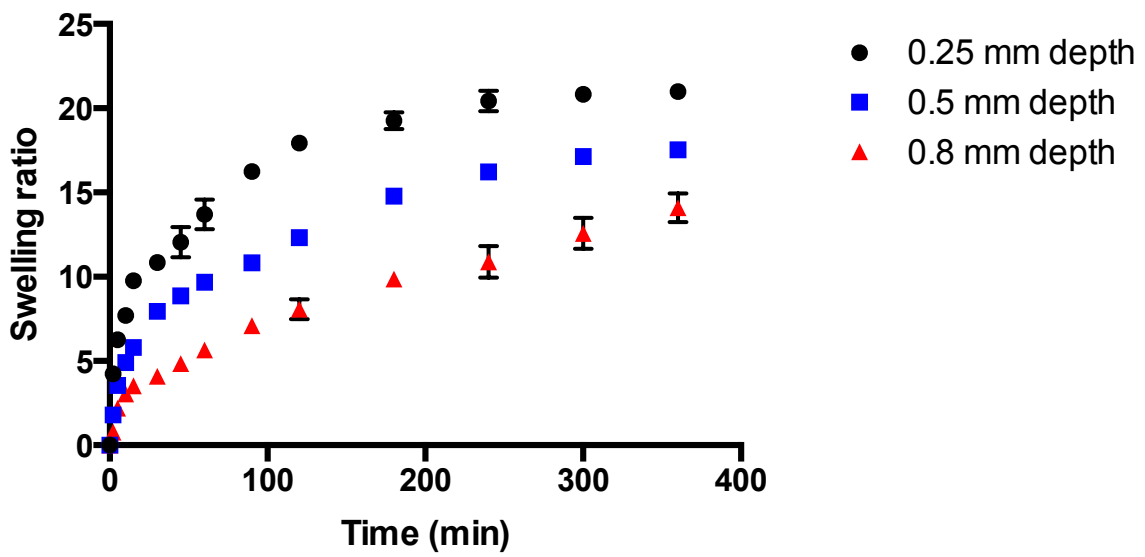

**ESI 2** Full set of data related to Figure 5a. Effect of decreasing depth of bulk hydrogels on swelling response in DI water from 0 to 350 min.

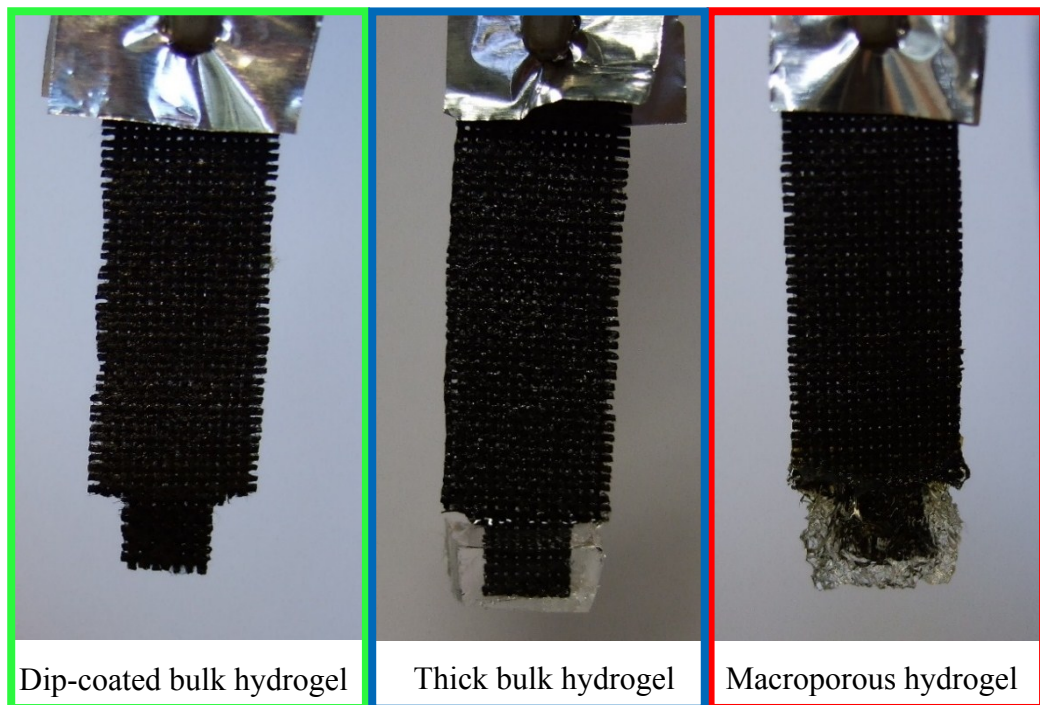

**ESI 3** Photographs of carbon cloth electrodes used for voltammetry modified with dip-coated bulk hydrogel, thick bulk hydrogel and macroporous hydrogel.
